# Supplementary material
Source: PubMed Central journal article supplement (PMC2636963)
Supplement: NIHMS86198-supplement.pdf [file NIHMS86198-supplement.pdf]

## Supporting Information

Figure S1. Optical microscopy image of as-synthesized DXNs at room temperature visualized at 40 $\times$ .

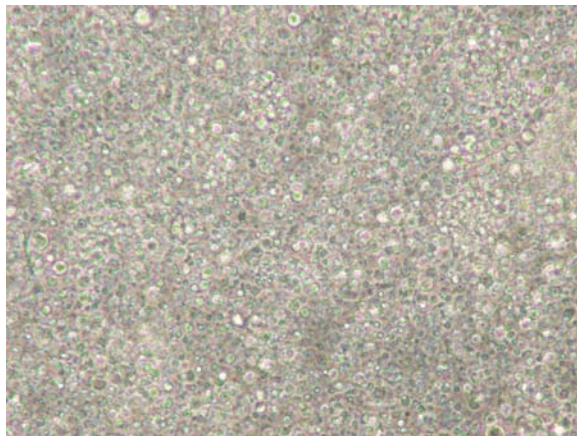

This information is available free of charge via the Internet at <http://pubs.acs.org>.
